# Supplementary material for: IQ and Schizophrenia in a Swedish National Sample: Their Causal Relationship and the Interaction of IQ With Genetic Risk
Source: Atypon-hosted journal article supplement (doi:10.1176/appi.ajp.2014.14040516), 2014-12-17

**TABLE S1. Calculation of Genetic Liability Score for Schizophrenia**

| <b><u>Genetic Liability Score for Schizophrenia</u></b>                        |                 |           |                            |          |                   |
|--------------------------------------------------------------------------------|-----------------|-----------|----------------------------|----------|-------------------|
|                                                                                | <b>Estimate</b> | <b>SE</b> | <b><math>\chi^2</math></b> | <b>p</b> | <b>Odds ratio</b> |
| <b>Intercept</b>                                                               | -5.630          | 0.007     | -623.67                    | <.0001   |                   |
| <b>MZ twin</b>                                                                 | 4.242           | 0.178     | 566.4                      | <.0001   | 69.52             |
| <b>Sibling</b>                                                                 | 2.738           | 0.045     | 3695.8                     | <.0001   | 15.46             |
| <b>Mother</b>                                                                  | 2.114           | 0.048     | 1913.8                     | <.0001   | 8.28              |
| <b>Father</b>                                                                  | 1.694           | 0.078     | 478.9                      | <.0001   | 5.44              |
| <b>Half sibling</b>                                                            | 1.287           | 0.150     | 73.6                       | <.0001   | 3.62              |
| <b>Cousin</b>                                                                  | 0.343           | 0.281     | 1.49                       | 0.2225   | 1.41              |
|                                                                                |                 |           |                            |          |                   |
| <b><u>Predicted probabilities of Schizophrenia (Sch)</u></b>                   |                 |           |                            |          |                   |
| <b>No relative with Sch</b>                                                    |                 |           |                            |          | 0.36 %            |
| <b>Morbid risk for Sch of 20 % for cousins</b>                                 |                 |           |                            |          | 0.38 %            |
| <b>Morbid risk for Sch of 100 % for half siblings</b>                          |                 |           |                            |          | 1.28 %            |
| <b>Mother with Sch</b>                                                         |                 |           |                            |          | 2.89 %            |
| <b>Father with Sch</b>                                                         |                 |           |                            |          | 1.92 %            |
| <b>Morbid Risk for Sch of 100 % for full siblings</b>                          |                 |           |                            |          | 5.26 %            |
| <b>Father with Sch + morbid risk of Sch of 50 % for siblings</b>               |                 |           |                            |          | 7.13 %            |
| <b>MZ twin with Sch</b>                                                        |                 |           |                            |          | 19.26 %           |
| <b>Father + morbid risk for Sch of 100 % for siblings and 20 % for cousins</b> |                 |           |                            |          | 23.18 %           |

**TABLE S2. Calculation of Genetic Liability Score for Nonaffective Psychosis**

| <b><u>Genetic Liability Score for NonAffective Psychosis</u></b>       |                 |           |                            |          |                   |
|------------------------------------------------------------------------|-----------------|-----------|----------------------------|----------|-------------------|
|                                                                        | <b>Estimate</b> | <b>SE</b> | <b><math>\chi^2</math></b> | <b>p</b> | <b>Odds ratio</b> |
| <b>Intercept</b>                                                       | -4.737          | 0.005     |                            | <.0001   |                   |
| <b>MZ twin</b>                                                         | 3.491           | 0.109     | 1029.5                     | <.0001   | 32.80             |
| <b>Sibling</b>                                                         | 2.081           | 0.024     | 7245.6                     | <.0001   | 8.01              |
| <b>Mother</b>                                                          | 1.431           | 0.021     | 4663.1                     | <.0001   | 4.18              |
| <b>Father</b>                                                          | 1.158           | 0.064     | 1448.4                     | <.0001   | 3.18              |
| <b>Half sibling</b>                                                    | 1.164           | 0.064     | 328.7                      | <.0001   | 3.20              |
| <b>Cousin</b>                                                          | 0.120           | 0.116     | 1.070                      | 0.301    | 1.13              |
|                                                                        |                 |           |                            |          |                   |
| <b><u>Predicted probabilities of Non Affective Psychosis (NAP)</u></b> |                 |           |                            |          |                   |
| <b>No relative with NAP</b>                                            |                 |           |                            |          | 0.87 %            |
| <b>Morbid risk for NAP of 100 % for half siblings</b>                  |                 |           |                            |          | 2.73 %            |
| <b>Mother with NAP</b>                                                 |                 |           |                            |          | 3.54 %            |
| <b>Father with NAP</b>                                                 |                 |           |                            |          | 2.71 %            |
| <b>Morbid Risk for NAP of 100 % for full siblings</b>                  |                 |           |                            |          | 6.56 %            |
| <b>Father with NAP + morbid risk of NAP of 50 % for siblings</b>       |                 |           |                            |          | 7.32 %            |
| <b>Father + morbid risk for NAP of 100 % for siblings</b>              |                 |           |                            |          | 18.28 %           |
| <b>MZ twin with NAP</b>                                                |                 |           |                            |          | 22.34 %           |

**FIGURE S1. Predicted Probability of Schizophrenia as a Function of Premorbid IQ and Level of Genetic Liability to Nonaffective Psychoses as Assessed in Relatives**

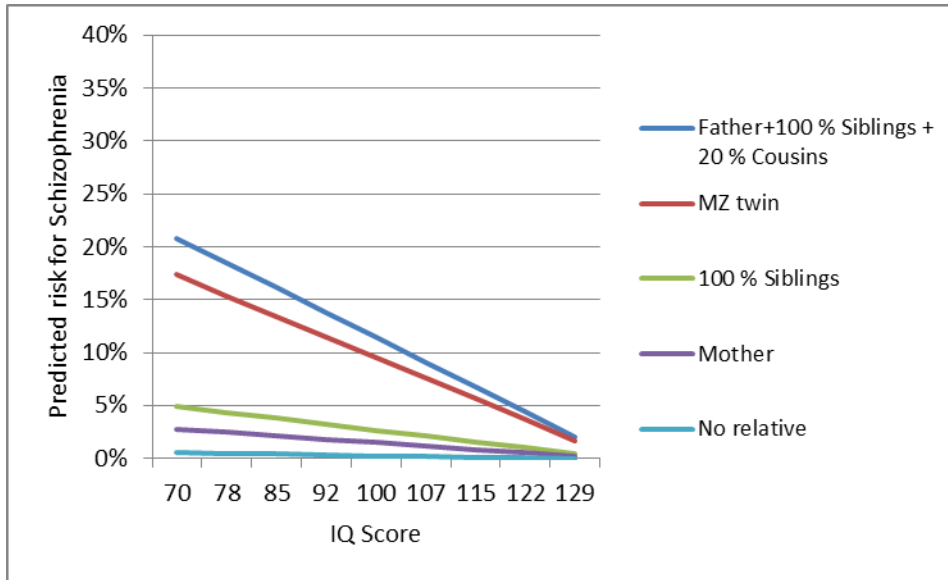

Supplement: appi.ajp.2014.14040516.ds001.pdf [file appi.ajp.2014.14040516.ds001.pdf]
