# Supplementary material for: IQ and Schizophrenia in a Swedish National Sample: Their Causal Relationship and the Interaction of IQ With Genetic Risk
Source: Atypon-hosted journal article supplement (doi:10.1176/appi.ajp.2014.14040516), 2014-12-17
Supplement: appi.ajp.2014.14040516.ds001.pdf [file appi.ajp.2014.14040516.ds001.pdf]

 


Psychiatry Online
